# Supplementary material for: Ozone air quality simulations with WRF-Chem (v3.5.1) over Europe: model evaluation and chemical mechanism comparison
Source: Copernicus journal article supplement (doi:10.5194/gmd-9-3699-2016), 2016-10-19
Supplement: Supplementary file 1 [file gmd-9-3699-2016-supplement.zip]

# S1 Summary statistics for RADM2 simulation against meteorological observations

Table S1: Domain-wide statistical performance of WRF-Chem RADM2 simulation against 3-hourly meteorological observations from BADC.

| Winter (DJF) |          |         |       |       |       |              |      | Spring (MAM) |          |       |       |       |      |              |  |
|--------------|----------|---------|-------|-------|-------|--------------|------|--------------|----------|-------|-------|-------|------|--------------|--|
| Mean-Obs     | Mean-Mod | MB      | NMB   | MFB   | r     | no. stations |      | Mean-Obs     | Mean-Mod | MB    | NMB   | MFB   | r    | no. stations |  |
| MSLP (hPa)   | 1015.41  | 1014.79 | -0.96 | -0.00 | -0.00 | 0.99         | 1297 | 1014.67      | 1014.46  | -0.35 | -0.00 | -0.00 | 0.99 | 1295         |  |
| T2 (°C)      | 2.51     | 2.99    | 0.29  | 0.11  | 0.26  | 0.89         | 1581 | 9.73         | 9.91     | -0.11 | -0.01 | 0.07  | 0.94 | 1581         |  |
| WS10 (m/s)   | 4.31     | 5.60    | 1.34  | 0.31  | 0.42  | 0.71         | 1577 | 3.86         | 4.46     | 0.65  | 0.17  | 0.29  | 0.68 | 1589         |  |
| WD10 (deg)   | 175.53   | 203.74  | 27.94 | 0.16  | 0.27  | 0.50         | 1568 | 167.88       | 188.67   | 21.16 | 0.13  | 0.25  | 0.48 | 1580         |  |
| Summer (JJA) |          |         |       |       |       |              |      | Fall (SON)   |          |       |       |       |      |              |  |
| Mean-Obs     | Mean-Mod | MB      | NMB   | MFB   | r     | no. stations |      | Mean-Obs     | Mean-Mod | MB    | NMB   | MFB   | r    | no. stations |  |
| MSLP (hPa)   | 1012.12  | 1012.11 | 0.03  | 0.00  | 0.00  | 0.98         | 1288 | 1017.61      | 1017.42  | -0.49 | -0.00 | -0.00 | 0.99 | 1297         |  |
| T2 (°C)      | 17.82    | 17.80   | -0.27 | -0.02 | -0.01 | 0.88         | 1573 | 9.20         | 9.66     | 0.25  | 0.03  | 0.47  | 0.95 | 1583         |  |
| WS10 (m/s)   | 3.45     | 3.92    | 0.50  | 0.14  | 0.27  | 0.63         | 1574 | 3.64         | 4.61     | 1.04  | 0.28  | 0.40  | 0.68 | 1585         |  |
| WD10 (deg)   | 173.88   | 197.03  | 23.38 | 0.13  | 0.25  | 0.45         | 1561 | 172.30       | 196.54   | 24.07 | 0.14  | 0.27  | 0.48 | 1574         |  |

## S2 Differences in implementation of dry deposition and photolysis

The MOZART mechanism in WRF uses a version of the standard WRF-Chem implementation of the Wesley dry deposition scheme (based on Wesely, 1989; Erisman et al., 1994) that has been modified to include a more complex seasonal variation in the dry deposition rates than is used in the standard implementation. Specifically, in the MOZART implementation of dry deposition, five different seasons are used to describe the variation in plant functional type, whereas in the standard implementation used by RADM2, only two seasons (summer and winter) are used. Furthermore, within the dry deposition routine, MOZART uses slightly different values for effective Henry’s Law coefficients and diffusion coefficients.

As indicated in Table 2 in the main text, the scheme used to calculate photolysis rates (J values) based on radiation differs in the MOZART and RADM2 simulations. RADM2 was run with the Madronich TUV scheme, whereas MOZART chemistry in WRF is designed to run with the Madronich FTUV scheme. The FTUV model has the same physical processes as the TUV model, except that the number of wavelength bins between 121 and 750 nm are 140 for TUV vs. 17 for FTUV, which speeds up computations and leads to differences in photolysis rates of less than 5% in the troposphere, as calculated by Tie et al. (2003). An additional difference is that when MOZART is run in WRF-Chem, the standard WRF-Chem FTUV scheme is further modified to read in climatological O<sub>3</sub> and O<sub>2</sub> overhead columns rather than using a fixed value.

## S3 Differences in inorganic rate coefficients

21

Table S2: Inorganic rate coefficients used in RADM2 that, for a July sensitivity study, were changed to match those used for the equivalent reactions in MOZART. Chemical equations and rate coefficient expressions are shown in the syntax of the Kinetic Pre Processor used to generate model code.

| Reaction          | Rate coefficient in base simulation                                                 | Rate coefficient as changed to match MOZART                                           |
|-------------------|-------------------------------------------------------------------------------------|---------------------------------------------------------------------------------------|
| O3P+NO2=NO+O2     | ARR2(6.5D-12, -120.0_dp, TEMP)                                                      | ARR2(5.6e-12_dp, -180.0_dp, TEMP)                                                     |
| O1D+M=O3P         | .78084* ARR2(1.8D-11, -110.0_dp, TEMP) + .20946e0*<br>ARR2(3.2D-11, -70.0_dp, TEMP) | .79_dp*ARR2(2.1e-11_dp, -115.0_dp, TEMP) +<br>.21_dp*ARR2(3.2e-11_dp, -70.0_dp, TEMP) |
| O3+NO=NO2+O2      | ARR2(2.0D-12, 1400.0_dp, TEMP)                                                      | ARR2(3.0e-12_dp, 1500.0_dp, TEMP)                                                     |
| O3+OH=HO2+O2      | ARR2(1.6D-12, 940.0_dp, TEMP)                                                       | ARR2(1.7e-12_dp, 940.0_dp, TEMP)                                                      |
| O3+HO2=OH+2.00 O2 | ARR2(1.1D-14, 500.0_dp, TEMP)                                                       | ARR2(1.0e-14_dp, 490.0_dp, TEMP)                                                      |
| HO2+NO=NO2+OH     | ARR2(3.7D-12, -240.0_dp, TEMP)                                                      | ARR2(3.5e-12_dp, -250.0_dp, TEMP)                                                     |
| H2O2+OH=HO2+H2O   | ARR2(3.3D-12, 200.0_dp, TEMP)                                                       | ARR2(2.9e-12_dp, 160.0_dp, TEMP)                                                      |
| O3+NO2=NO3        | ARR2(1.4D-13, 2500.0_dp, TEMP)                                                      | ARR2(1.2e-13_dp, 2450.0_dp, TEMP)                                                     |
| NO3+NO=NO2+NO2    | ARR2(1.7D-11, -150.0_dp, TEMP)                                                      | ARR2(1.5e-11_dp, -170._dp, TEMP)                                                      |
| NO3+NO2=N2O5      | TROE( 2.20D-30 , 4.3_dp , 1.50D-12 , 0.5_dp , TEMP,<br>C_M)                         | TROE( 2.e-30_dp , 4.4_dp , 1.4e-12_dp , .7_dp , TEMP,<br>C_M)                         |
| OH+NO2=HNO3       | TROE( 2.60D-30 , 3.2_dp , 2.40D-11 , 1.3_dp , TEMP,<br>C_M)                         | TROE( 2.e-30_dp , 3._dp , 2.5e-11_dp , 0._dp , TEMP,<br>C_M)                          |
| OH+HNO3=NO3+H2O   | k46(TEMP,C_M)                                                                       | usr5( TEMP, C_M )                                                                     |
| OH+HO2=H2O+O2     | ARR2(4.6D-11, -230.0_dp, TEMP)                                                      | ARR2(4.8e-11_dp, -250.0_dp, TEMP)                                                     |
| OH+SO2=SULF+HO2   | TROE( 3.00D-31 , 3.3_dp , 1.50D-12 , 0.0_dp , TEMP,<br>C_M)                         | usr23( TEMP, C_M )                                                                    |
| CO+OH=HO2+CO2     | (1.5D-13 * (1._dp + 2.439D-20*C_M))                                                 | usr8(temp, C_M)                                                                       |

22 **Definition of rate expressions in Table S2.**

23 REAL(kind=dp) FUNCTION ARR2( A0,B0, TEMP )

24 REAL(kind=dp) :: TEMP

25 REAL(kind=dp) A0,B0

26 ARR2 = A0 \* EXP( -B0 /TEMP )

27 END FUNCTION ARR2

28

29 REAL(KIND=dp) FUNCTION usr5( temp, C\_M )

30 REAL(KIND=dp), INTENT(IN) :: temp

31 REAL(KIND=dp), INTENT(IN) :: C\_M

32 REAL(KIND=dp) :: k0, k2

33 k0 = C\_M \* 6.5e-34\_dp \* exp( 1335.\_dp/temp )

34 k2 = exp( 2199.\_dp/temp )

35 k0 = k0 /(1.0\_dp + k0/(2.7e-11\_dp\*k2))

36 k2 = exp( 460.\_dp/temp )

37 usr5 = k0 + 2.4e-14\_dp \* k2

38 END FUNCTION usr5

39

40 REAL(KIND=dp) FUNCTION usr23( temp, C\_M )

41 REAL(KIND=dp), INTENT(IN) :: temp

42 REAL(KIND=dp), INTENT(IN) :: C\_M

43 REAL(KIND=dp) :: fc, k0

44 REAL(KIND=dp) :: wrk

45 fc = 3.e-11\_dp \* (300.\_dp/temp) \*\* 3.3\_dp

46 wrk = fc \* C\_M

47 k0 = wrk / (1.\_dp + wrk/1.5e-12\_dp)

48 usr23 = k0 \* .6\_dp \*\* (1.\_dp/(1.\_dp + (log10( wrk/1.5e-12\_dp ))\*\*2.\_dp))

49 END FUNCTION usr23

50

51 REAL(KIND=dp) FUNCTION usr8( temp, C\_M )

52 REAL(KIND=dp), INTENT(IN) :: temp

53 REAL(KIND=dp), INTENT(IN) :: C\_M



```

54 REAL(KIND=dp), parameter :: boltz = 1.38044e-16_dp
55 usr8 = 1.5e-13_dp * (1._dp + 6.e-7_dp*boltz*C_M*temp)
56 END FUNCTION usr8
57
58 REAL(KIND=dp) FUNCTION k46( TEMP, C_M
59 REAL(KIND=dp), INTENT(IN) :: temp, C_M
60 REAL(KIND=dp) :: k0, k2, k3
61 k0=7.2E-15_dp * EXP(785._dp/TEMP)
62 k2=4.1E-16_dp * EXP(1440._dp/TEMP)
63 k3=1.9E-33_dp * EXP(725._dp/TEMP) * C_M
64 k46=k0+k3/(1+k3/k2)
65 END FUNCTION k46
66

```

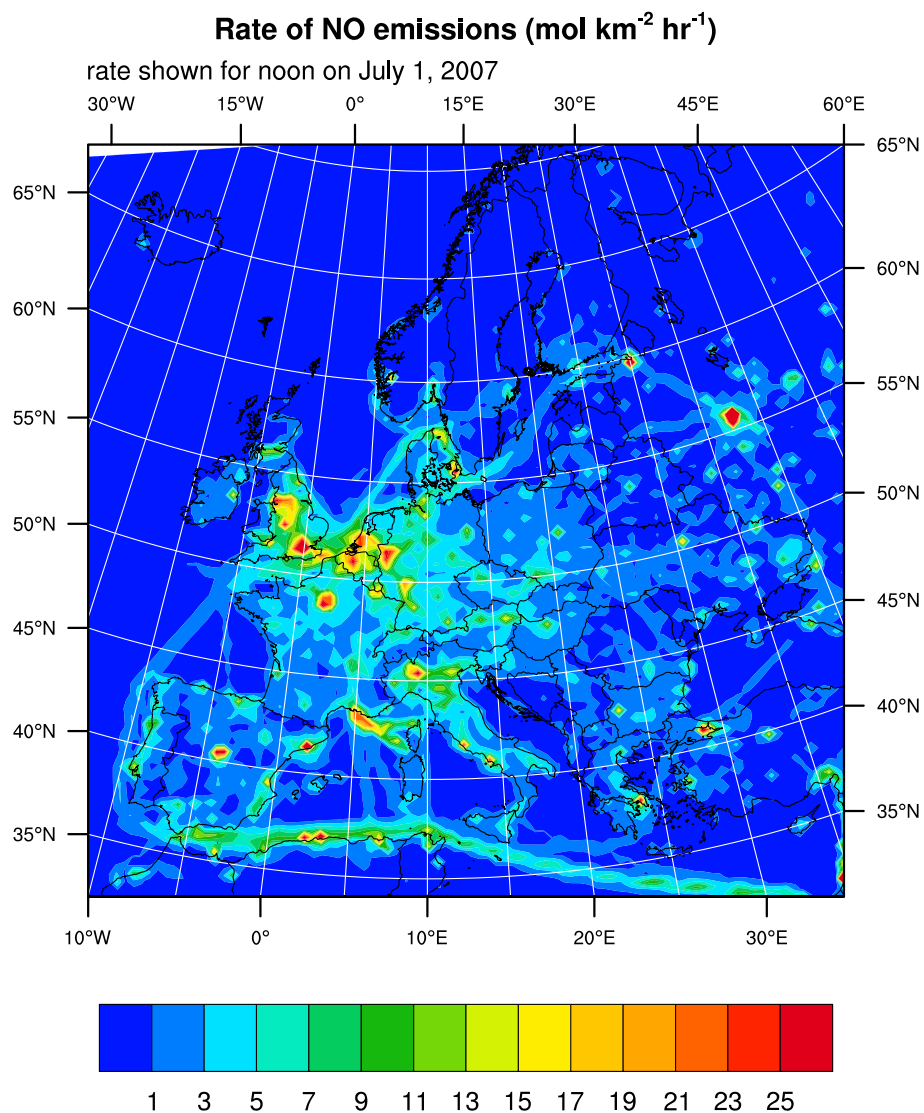

Figure S1: Example of NO emissions as processed for model input, combining the TNO-MACC II emissions inventory with the HTAP v2 inventory for the domain edges.

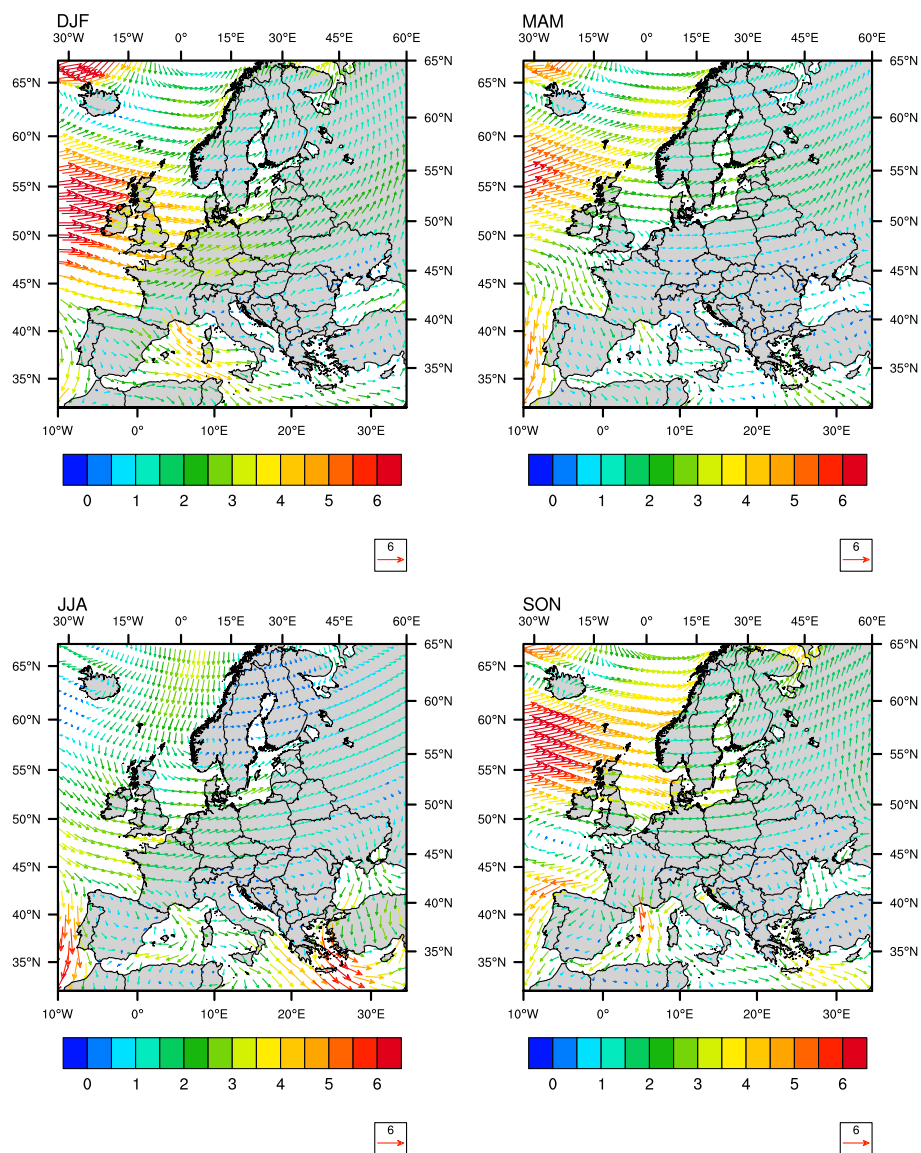

Figure S2: Seasonally-averaged wind vectors from ERA-Interim Reanalysis dataset for 2007, which used as meteorological forcing in our WRF-Chem simulations. Colors and vector length represent the wind speed in  $\text{m s}^{-1}$ .

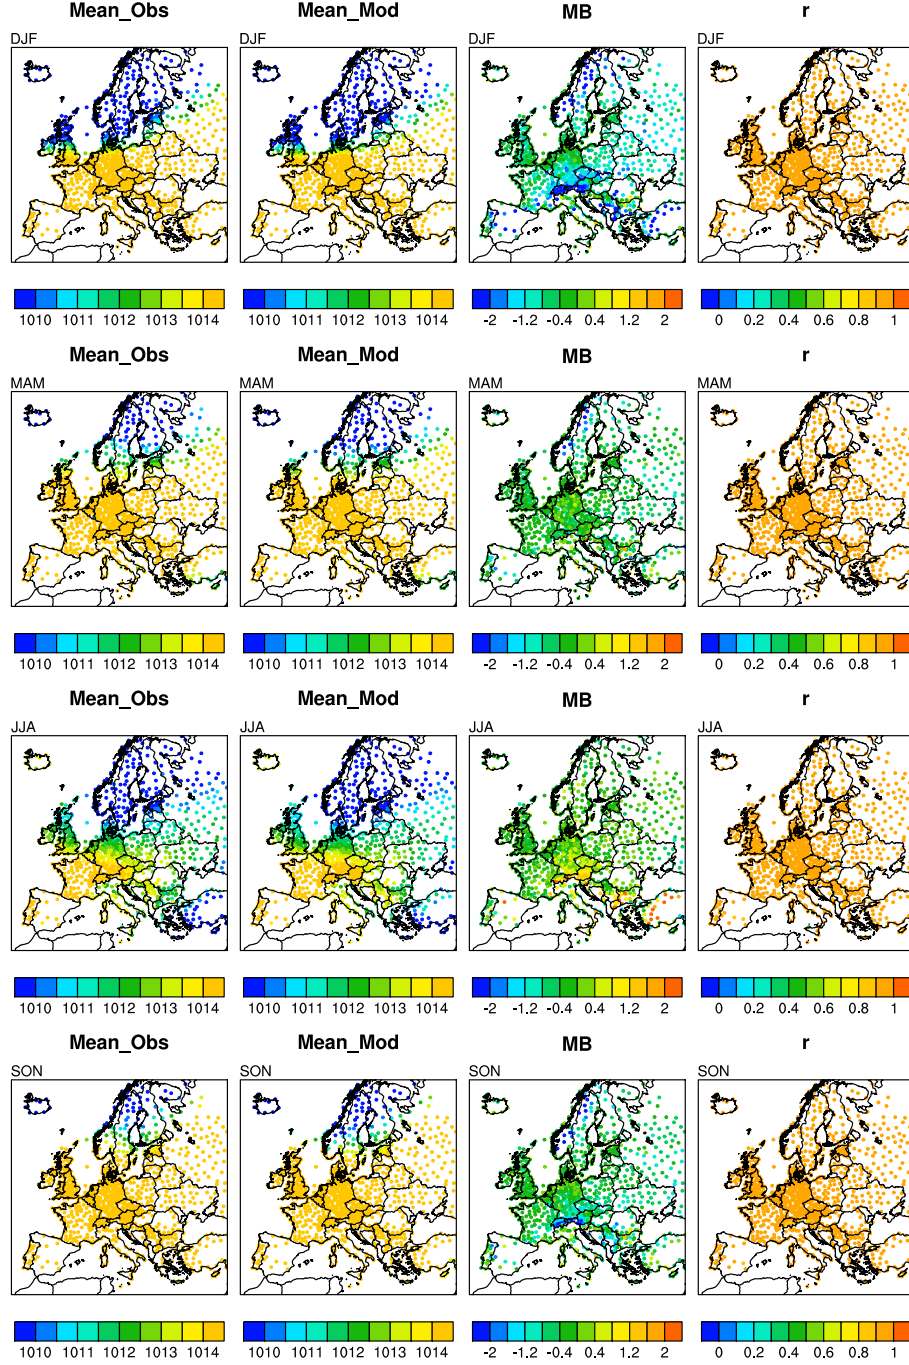

Figure S3: Seasonal average values of mean sea-level pressure (MSLP) in Pa. Model results from MOZART and statistics are shown at the locations of the observations.

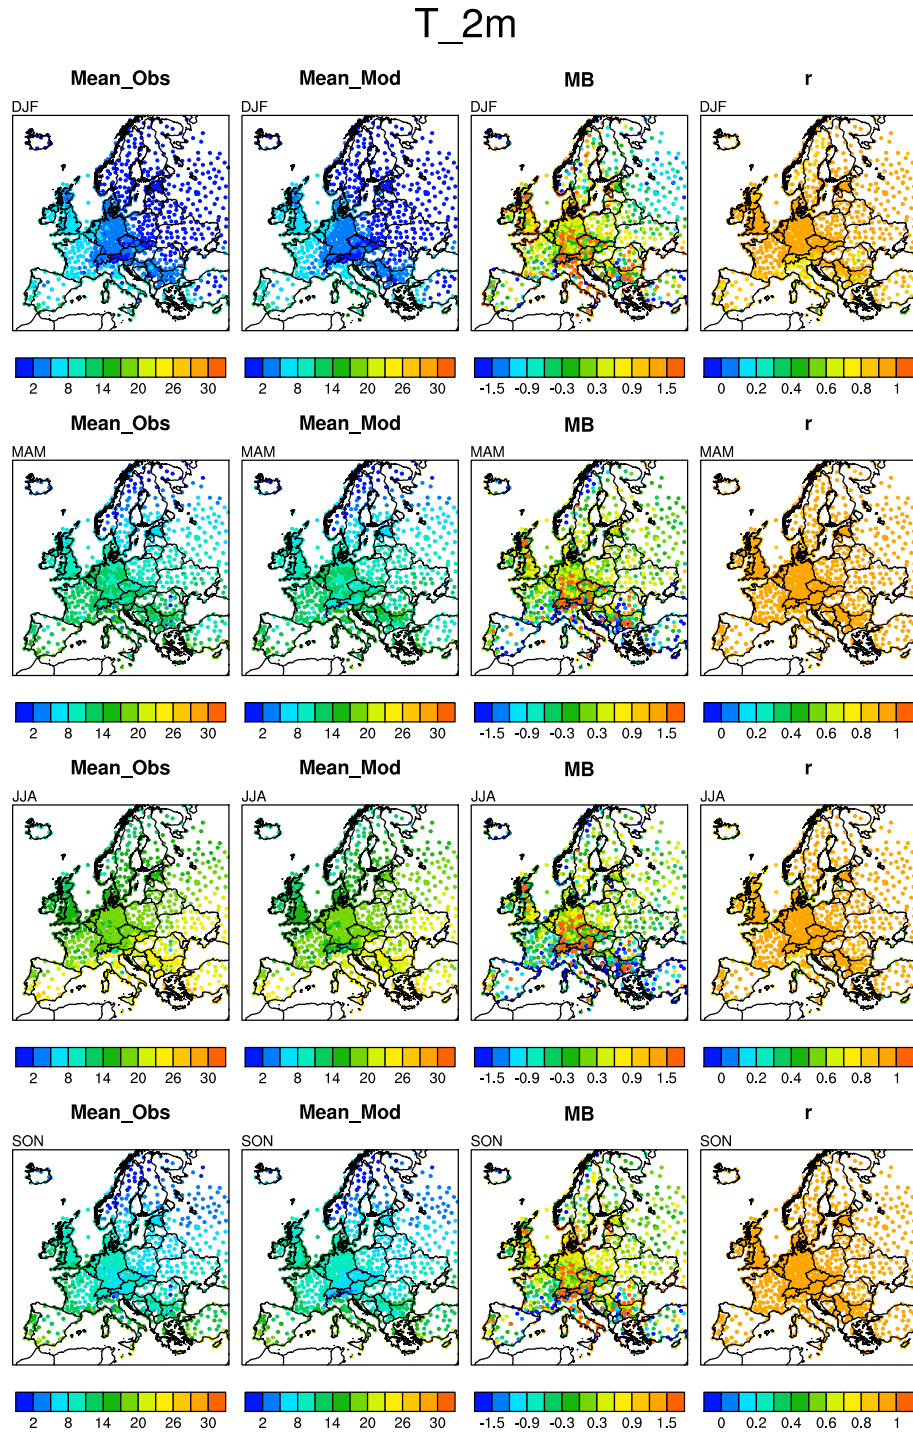

Figure S4: Seasonal average values of 2-meter temperature (T<sub>2</sub>) in degrees Celcius. Model results from RADM2 and statistics are shown at the locations of the observations.



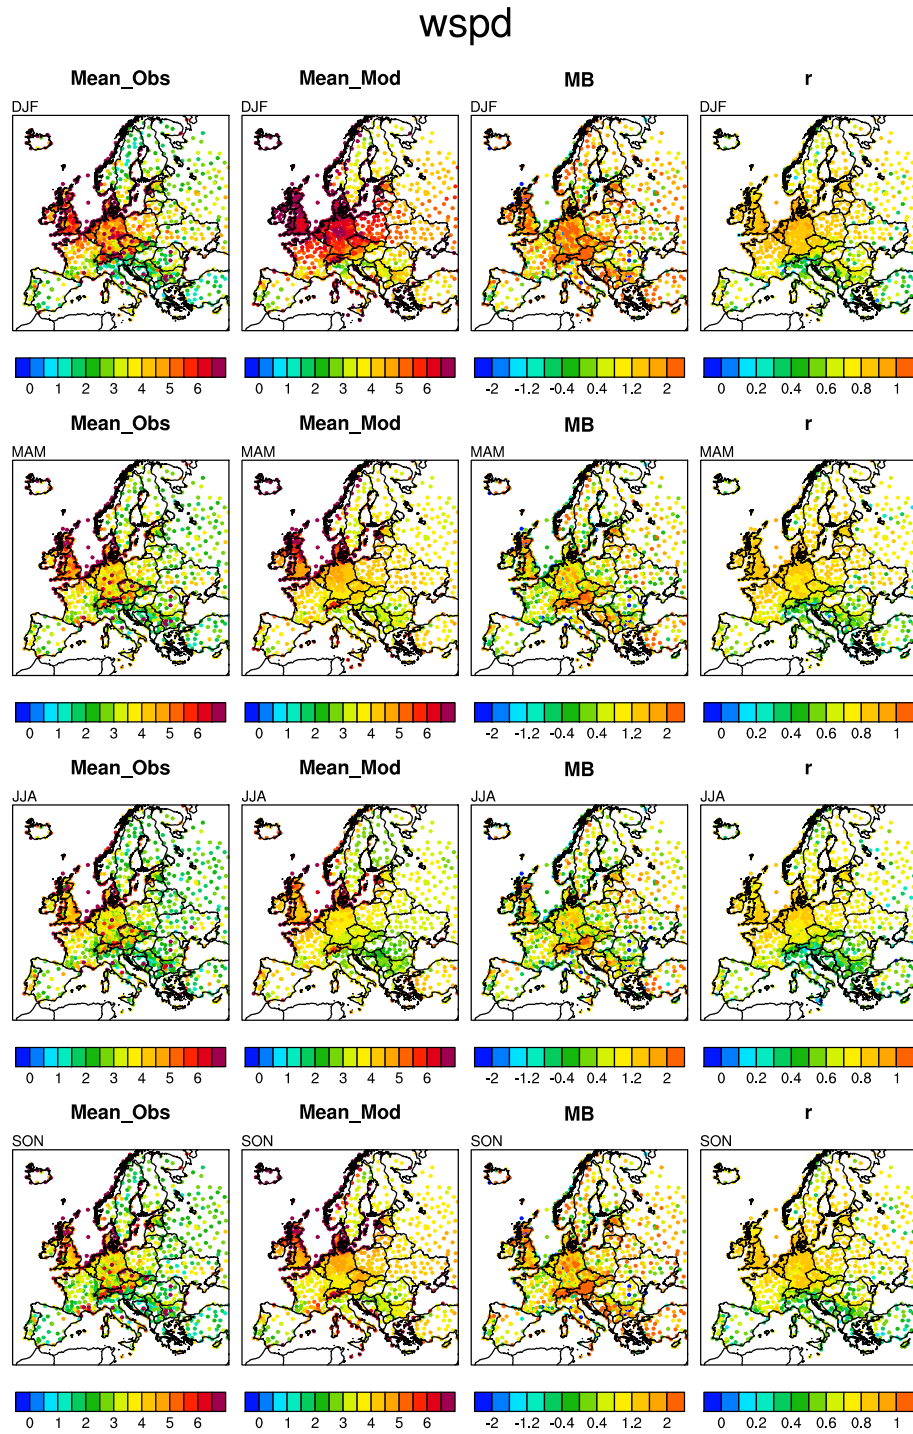

Figure S5: Seasonal average values of 10-meter wind speed (WS10) in m/s. Model results from RADM2 and statistics are shown at the locations of the observations.

wdir

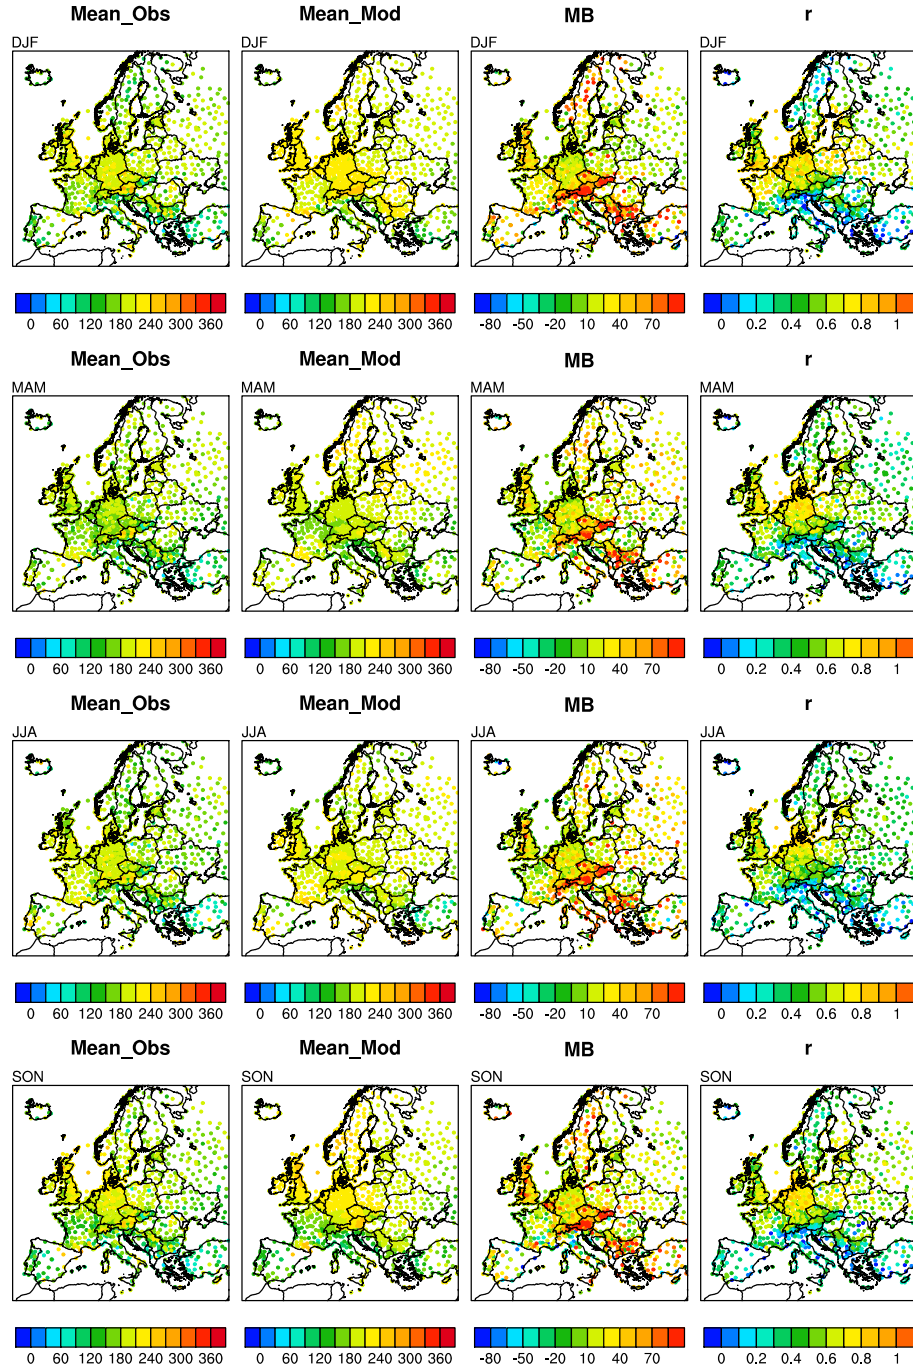

Figure S6: Seasonal average values of 10-meter wind speed (WS10) in m/s. Model results from RADM2 and statistics are shown at the locations of the observations.

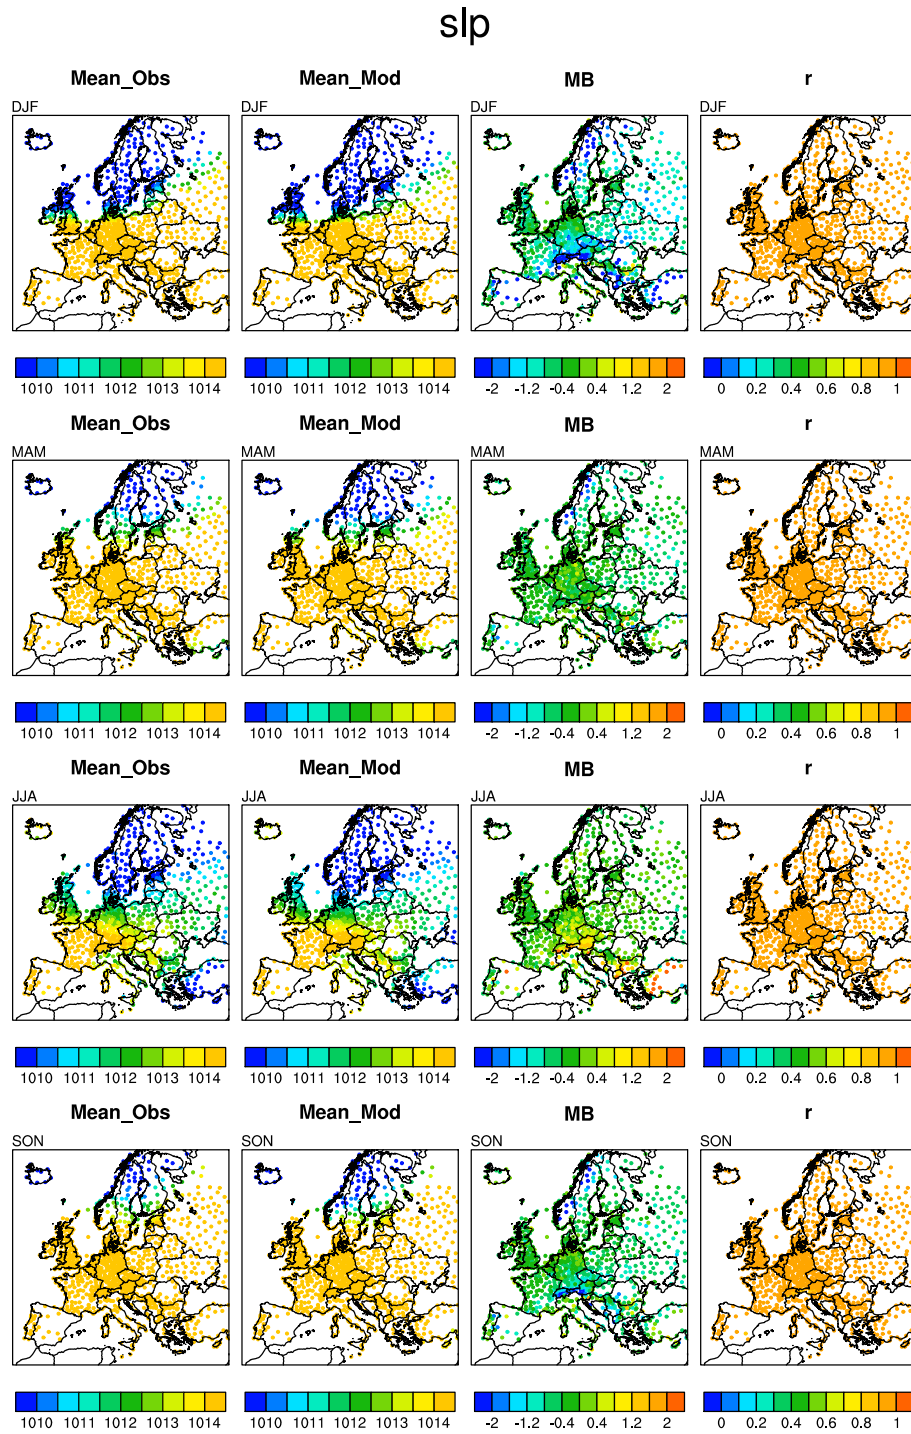

Figure S7: Seasonal average values of mean sea-level pressure (MSLP) in Pa. Model results from RADM2 and statistics are shown at the locations of the observations.



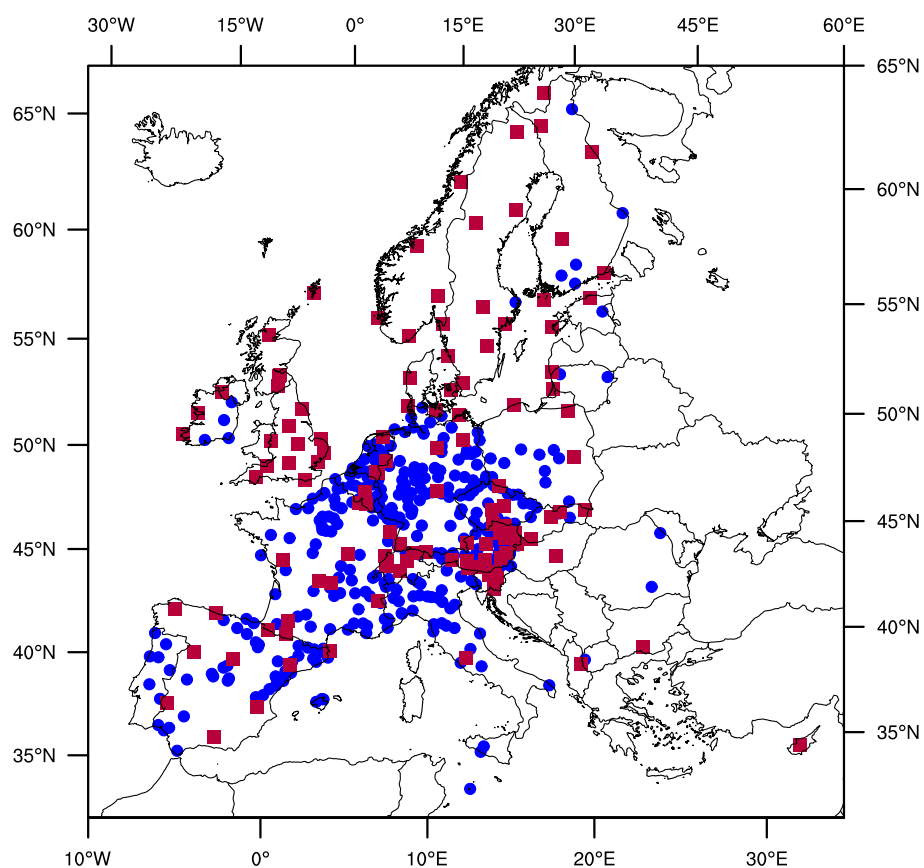

Figure S8: Location of AirBase (blue circles) and EMEP (red squares) observation sites. Shown here are stations which passed the completeness criteria for hourly  $O_3$  measurements for summer 2007.

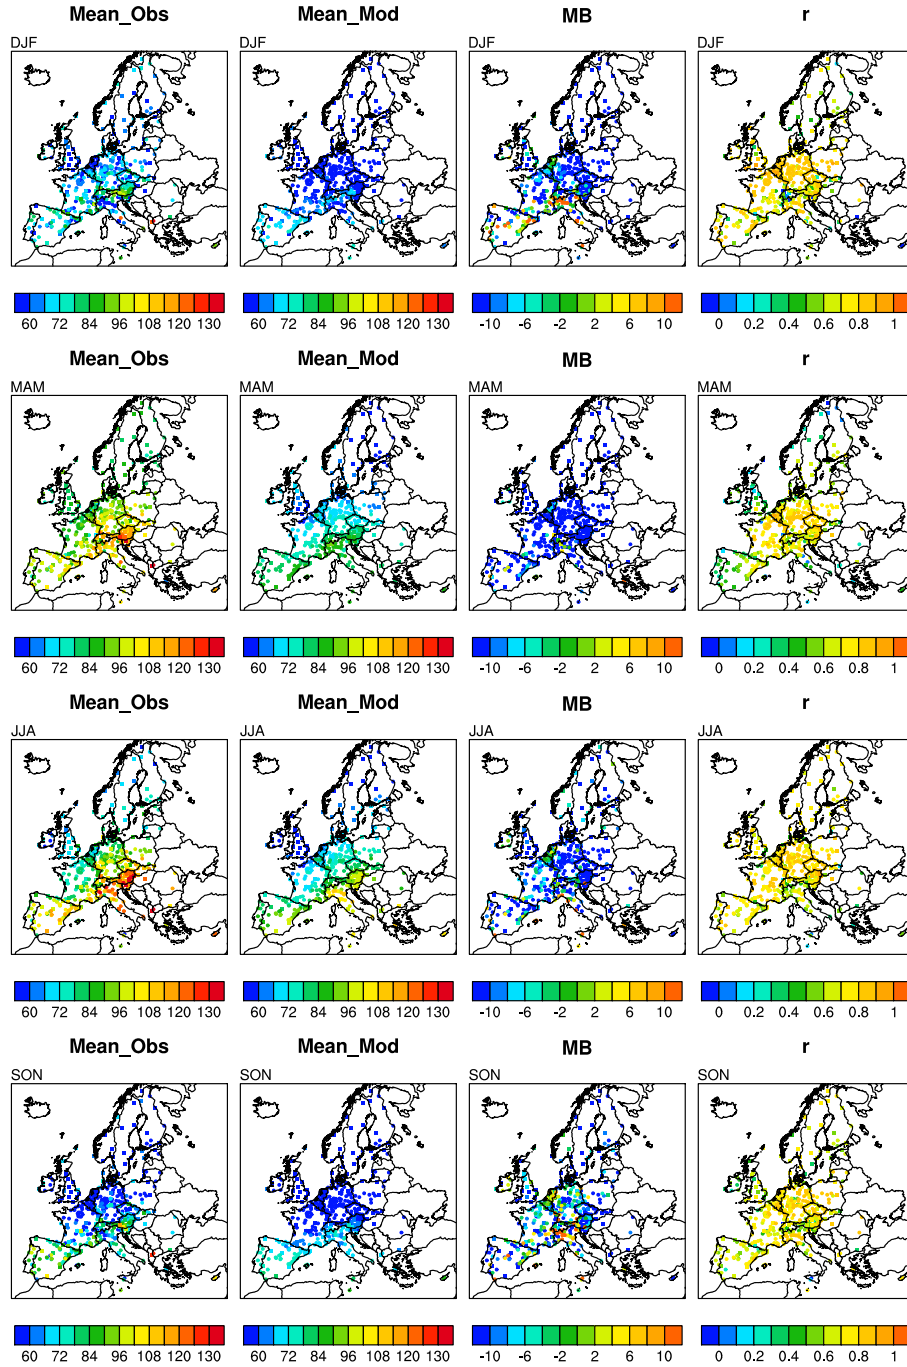

Figure S9: Seasonal average values of MDA8 in  $\mu\text{g m}^{-3}$  calculated from hourly measurements at AirBase (circles) and EMEP (squares) stations, and modeled values from RADM2 for corresponding locations. The Mean Bias (MB, in  $\mu\text{g m}^{-3}$ ) and temporal correlation coefficient (r) for daily values are also shown at the location of station observations.

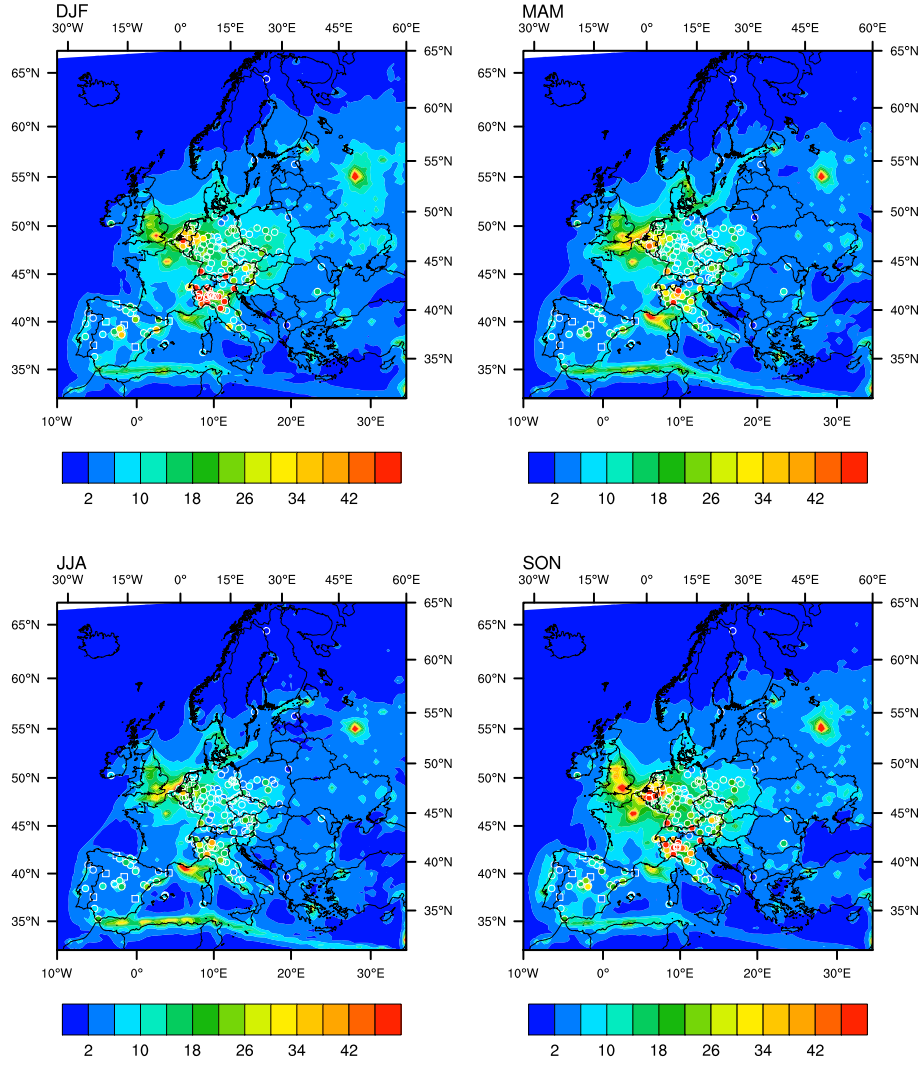

Figure S10: Seasonal average values of surface  $\text{NO}_x$  in  $\mu\text{g m}^{-3}$ . Contours are model output with the RADM2 mechanism. Filled dots represent hourly measurements at AirBase rural background stations, filled squares represent measurements at EMEP stations.

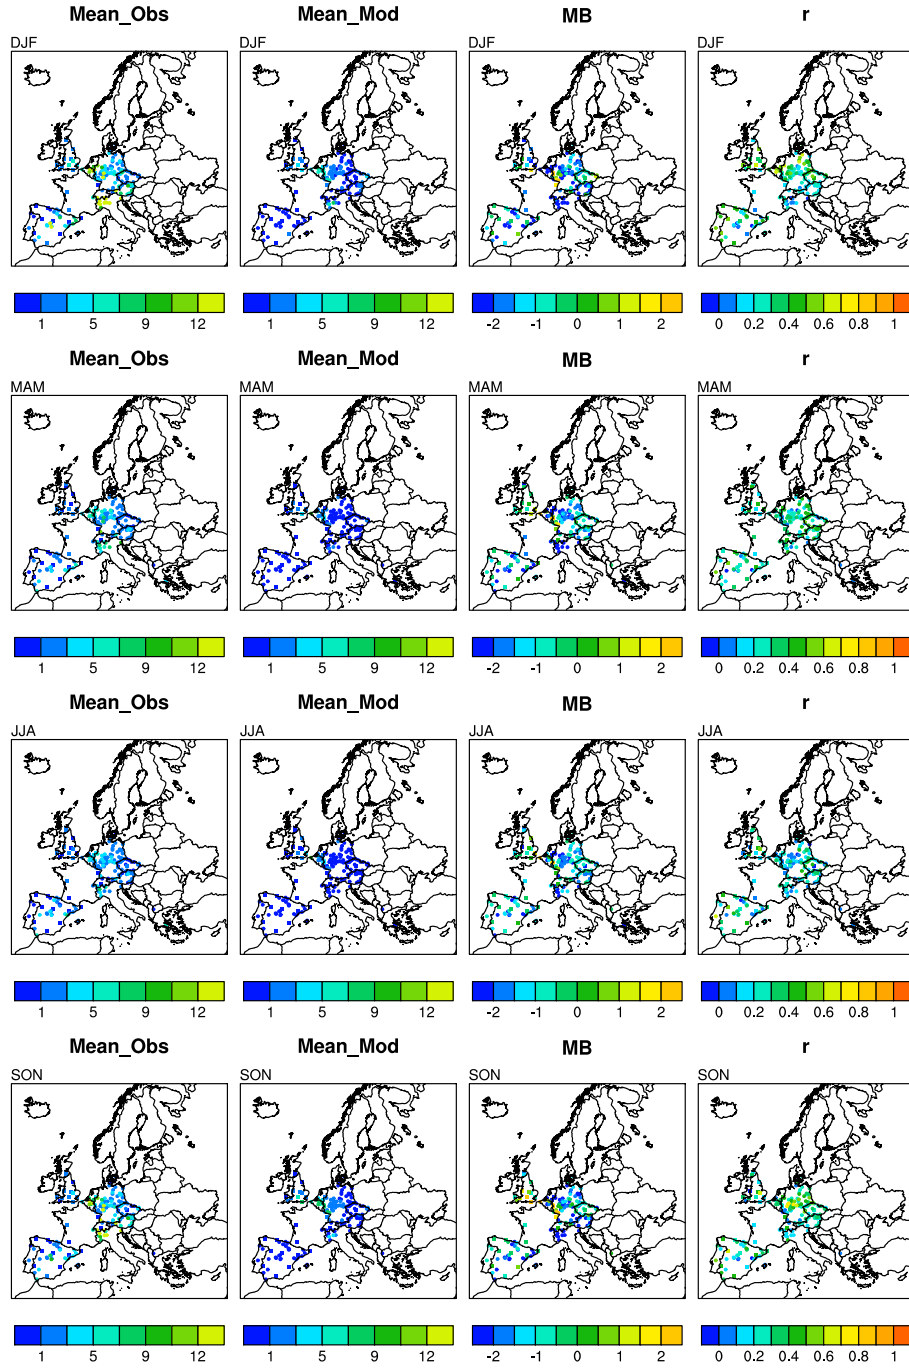

Figure S11: Seasonal average values of surface NO in  $\mu\text{g m}^{-3}$  from hourly measurements at AirBase (circles) and EMEP (squares) stations, and modeled values from RADM2 for corresponding locations. The Mean Bias (MB) and temporal correlation coefficient ( $r$ ) for hourly values are also shown at the location of station observations.

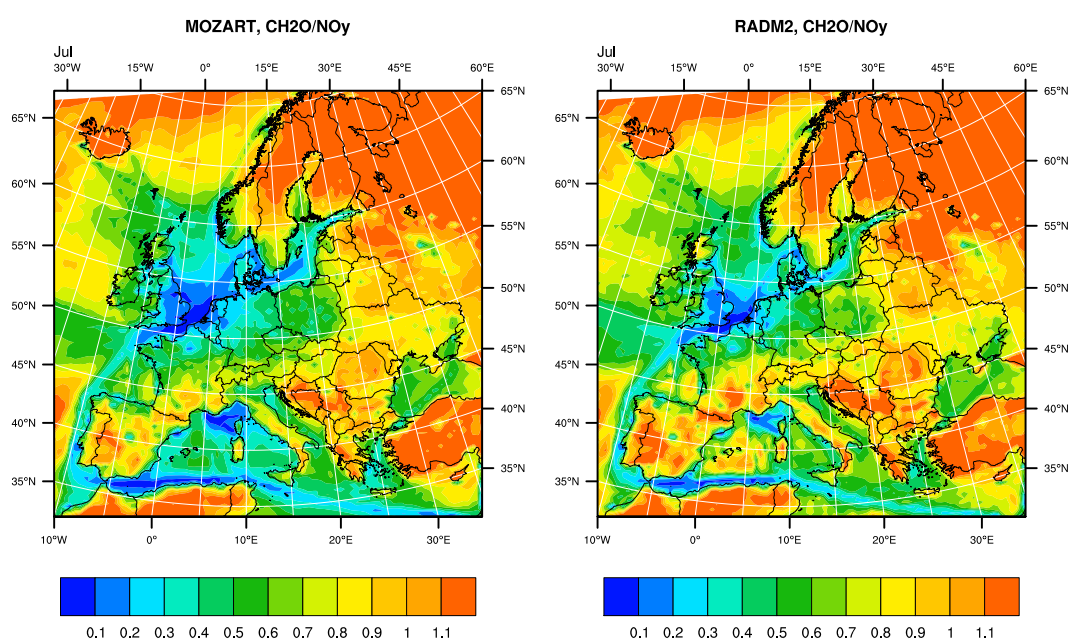

Figure S12: The spatial distribution of the monthly midday (11:00 - 14:00 CEST) ratio of CH<sub>2</sub>O to NO<sub>y</sub>. Following Sillman (1995), values of CH<sub>2</sub>O/NO<sub>y</sub> less than 0.28 indicated NO<sub>x</sub>-saturated chemistry, and values greater than 0.28 indicate NO<sub>x</sub>-sensitive chemistry.

## References

- J. W. Erisman, A. V. Pul, and P. Wyers. Parametrization of surface resistance for the quantification of atmospheric deposition of acidifying pollutants and ozone. *Atmospheric Environment*, 28(16):2595 – 2607, 1994. ISSN 1352-2310. doi: [http://dx.doi.org/10.1016/1352-2310\(94\)90433-2](http://dx.doi.org/10.1016/1352-2310(94)90433-2). URL <http://www.sciencedirect.com/science/article/pii/1352231094904332>.
- S. Sillman. The use of  $\text{NO}_y$ ,  $\text{H}_2\text{O}_2$ , and  $\text{HNO}_3$  as indicators for ozone- $\text{NO}_x$ -hydrocarbon sensitivity in urban locations. *Journal of Geophysical Research: Atmospheres*, 100(D7):14175–14188, 1995. ISSN 2156-2202. doi: 10.1029/94JD02953. URL <http://dx.doi.org/10.1029/94JD02953>.
- X. Tie, S. Madronich, S. Walters, R. Zhang, P. Rasch, and W. Collins. Effect of clouds on photolysis and oxidants in the troposphere. *Journal of Geophysical Research: Atmospheres*, 108(D20):n/a–n/a, 2003. ISSN 2156-2202. doi: 10.1029/2003JD003659. URL <http://dx.doi.org/10.1029/2003JD003659>. 4642.
- M. Wesely. Parameterization of surface resistance to gaseous dry deposition in regional-scale numerical models. *Atmospheric Environment*, 23:1293–1304, 1989. doi: doi:10.1016/0004-6981(89)90153-4.
