# Supplementary material for: Ozone air quality simulations with WRF-Chem (v3.5.1) over Europe: model evaluation and chemical mechanism comparison
Source: Copernicus journal article supplement (doi:10.5194/gmd-9-3699-2016), 2016-10-19
Supplement: Supplementary file 2 [file gmd-9-3699-2016-supplement.zip]

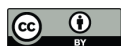

*Supplement of*

## **Ozone air quality simulations with WRF-Chem (v3.5.1) over Europe: model evaluation and chemical mechanism comparison**

**Kathleen A. Mar et al.**

*Correspondence to:* Kathleen A. Mar ([kathleen.mar@iass-potsdam.de](mailto:kathleen.mar@iass-potsdam.de))

- [gmd-9-3699-2016-supplement-title-page.pdf](#)
- [namelists-mozart-and-radm2.pdf](#)
- [supplement-mar-20161011\\_compress.pdf](#)

The copyright of individual parts of the supplement might differ from the CC-BY 3.0 licence.
